# Supplementary material
Source: PubMed Central journal article supplement (PMC4544778)
Supplement: NIHMS703118-supplement-Supp_MaterialS1.pdf [file NIHMS703118-supplement-Supp_MaterialS1.pdf]

# Supplementary material for “Sequence kernel association analysis of rare variant set based on the marginal regression model for binary traits”

Baolin Wu<sup>1</sup>, James S. Pankow<sup>2</sup>, Weihua Guan<sup>1</sup>

<sup>1</sup>Division of Biostatistics, <sup>2</sup>Division of Epidemiology and Community Health  
School of Public Health, University of Minnesota

## 1 Simulation studies

We conducted extensive simulation studies to evaluate the performance of the proposed and existing methods. Following Lee *et al.* (2012), we generated 10,000 European-like haplotypes of length 1000 kb under a calibrated coalescent model (Schaffner *et al.*, 2005). We randomly pair the haplotypes to simulate a total population of  $10^6$  individuals. We randomly select a gene region of length 10 kb and study those rare variants with  $\text{MAF} \leq 0.01$ . We consider two covariates  $Z = (Z_1, Z_2)'$ :  $Z_1 \in \{0, 1\}$  follows Bernoulli(0.5), and  $Z_2 \sim N(0, 1)$ . We model the logit disease risk as  $\text{expit}(\beta_0 + Z' \beta_Z + \sum_{j=1}^m \beta_j G_j)$ . We set  $\beta_0 = -3.4, \beta_Z = (0.5, 0.5)'$  (corresponding to 5% population disease rate). We randomly select  $n_e$  cases and  $n_c$  controls from the simulated population of  $10^6$  samples. We compared five rare variant set analysis methods: SKAT, SKAT-O, SKAT<sub>L</sub>, SKAT-O<sub>L</sub> and burden test. In the burden and SKAT tests, we assign weight  $\text{Beta}(p_j; a_0, b_0)$  to the  $j$ th variant  $G_j$ . And for the proposed method we assign weight  $\text{Beta}(p_j; a_1, b_1)$ . Here  $p_j$  is the MAF of  $G_j$ . For a given variant, the likelihood ratio test statistic is inherently standardized and roughly corresponds to the standardized score statistics, which

Table 1: Type I error of rare variant set analysis:  $n_e = 2500$  cases and  $n_c = 2500$  controls. The Type I errors have been divided by their nominal levels

| $(a_1, b_1)$        | (1,25)    |           |           | (1.5,25.5) |           |           | (2,26)    |           |           |
|---------------------|-----------|-----------|-----------|------------|-----------|-----------|-----------|-----------|-----------|
| $\alpha$            | $10^{-4}$ | $10^{-3}$ | $10^{-2}$ | $10^{-4}$  | $10^{-3}$ | $10^{-2}$ | $10^{-4}$ | $10^{-3}$ | $10^{-2}$ |
| SKAT <sub>L</sub>   | 0.69      | 0.74      | 0.90      | 1.07       | 1.05      | 1.04      | 1.06      | 1.02      | 1.03      |
| SKAT-O <sub>L</sub> | 0.91      | 0.92      | 0.99      | 0.96       | 1.00      | 1.05      | 1.10      | 1.12      | 1.07      |

Table 2: Type I error of rare variant set analysis:  $n_e = 1700$  cases and  $n_c = 3300$  controls. The Type I errors have been divided by their nominal levels

| $(a_1, b_1)$        | (1,25)    |           |           | (1.5,25.5) |           |           | (2,26)    |           |           |
|---------------------|-----------|-----------|-----------|------------|-----------|-----------|-----------|-----------|-----------|
| $\alpha$            | $10^{-4}$ | $10^{-3}$ | $10^{-2}$ | $10^{-4}$  | $10^{-3}$ | $10^{-3}$ | $10^{-4}$ | $10^{-3}$ | $10^{-2}$ |
| SKAT <sub>L</sub>   | 0.75      | 0.83      | 0.95      | 1.08       | 1.07      | 1.05      | 0.93      | 1.06      | 1.05      |
| SKAT-O <sub>L</sub> | 0.93      | 0.95      | 1.03      | 0.92       | 0.98      | 1.02      | 1.12      | 1.12      | 1.09      |

is the score statistics used in SKAT scaled by its standard error, which is roughly proportional to  $\sqrt{p_j(1-p_j)}$ . Therefore for the proposed method, we set  $a_1 = a_0 + 0.5$  and  $b_1 = b_0 + 0.5$ . We investigated three sets of weights for  $(a_0, b_0)$ : (0.5,24.5), (1,25), and (1.5,25.5); and two case-control ratios for  $(n_e, n_c)$ : (2500,2500) and (1700,3300).

We use  $10^7$  experiments to evaluate the type I error at the nominal significance level  $\alpha = 10^{-4}, 10^{-3},$  and  $10^{-2}$  by setting all  $\beta_j = 0$ . The results are summarized in Table 1 and 2 for the two case-control ratios. We can see that the the proposed methods appropriately controlled the Type I errors. The Type I errors are generally protected under different weights, which is consistent with the observations of Wu *et al.* (2011).

We also conducted  $10^8$  simulations to verify that the proposed methods have well-calibrated p-values at very stringent genome-wide significance level. Table 3 shows that the proposed methods appropriately control type I errors at small  $\alpha$  levels. Figure 1 shows the corresponding QQ plots for the proposed SKAT<sub>L</sub> and SKAT-O<sub>L</sub> with weights  $(a_1 = 1.5, b_1 = 25.5)$  based on  $10^8$  simulations.

We use  $10^4$  experiments to evaluate the power under various combinations of  $\beta_j$  at  $\alpha = 10^{-6}, 10^{-5}, 10^{-4},$  and  $10^{-3}$ . The rare variant effects  $\beta_j$  are set as follows. Each time we randomly select  $\theta$  proportion of rare variants and set their  $|\beta_j| = d \log_{10}(p_j)$ . The other null rare variants have zero coefficients. We have assumed that rarer variants have larger effect sizes. We conducted

Table 3: Type I error estimates of proposed methods with weight  $(a_1 = 1.5, b_1 = 25.5)$  at stringent  $\alpha$  level based on  $10^8$  simulations: Type I error has been scaled by the nominal significance level  $\alpha$ .

| $(n_e, n_c)$        | (2500,2500) |           | (1700,3300) |           |
|---------------------|-------------|-----------|-------------|-----------|
| $\alpha$            | $10^{-5}$   | $10^{-6}$ | $10^{-5}$   | $10^{-6}$ |
| SKAT <sub>L</sub>   | 1.08        | 1.06      | 1.05        | 1.09      |
| SKAT-O <sub>L</sub> | 0.93        | 0.89      | 0.93        | 0.78      |

Figure 1: QQ plots of  $10^8$  p-values: plotted are the negative log (base 10) transformed p-values vs their expected values.

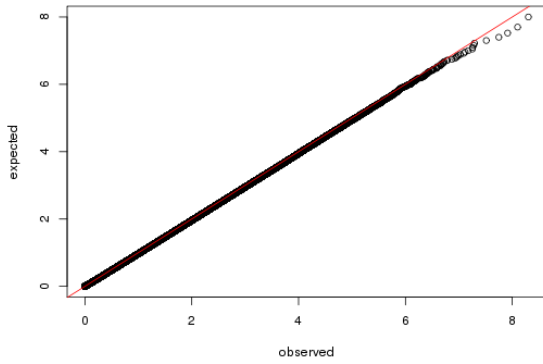

(a) SKAT<sub>L</sub> p-values:  $n_e = n_c = 2500$

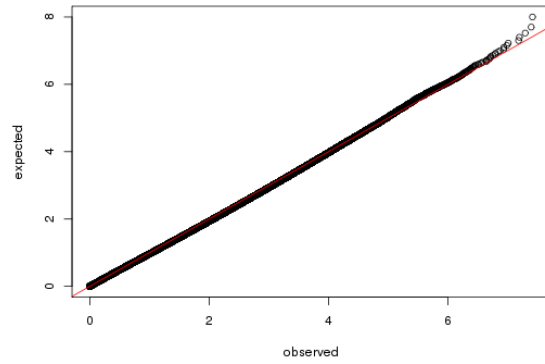

(b) SKAT-O<sub>L</sub> p-values:  $n_e = n_c = 2500$

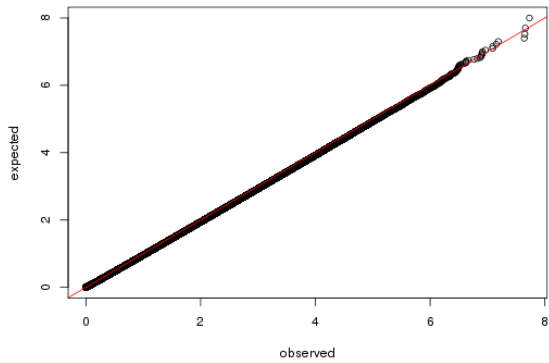

(c) SKAT<sub>L</sub> p-values:  $n_e = 1700, n_c = 3300$

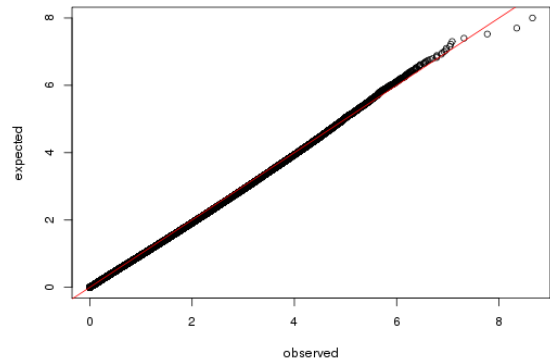

(d) SKAT-O<sub>L</sub> p-values:  $n_e = 1700, n_c = 3300$

simulations for (1)  $\theta = 0.05, d = -0.6$ , (2)  $\theta = 0.1, d = -0.5$ , (3)  $\theta = 0.2, d = -0.4$ , (4)  $\theta = 0.5, d = -0.25$ . They correspond to odds ratio of 3.32, 2.72, 2.23 and 1.65 for MAF=0.01 respectively. We consider two scenarios for the direction of causal variant effects. First, we assume a mix of equal proportions of protective and deleterious variants, which will in general favor the kernel association test. Second, we assume a mix of unequal proportions of protective and deleterious variants. Specially we randomly set signs of  $\beta_j$  as negative or positive with probability 0.9 and 0.1 respectively.

Tables 4 through 9 summarized the power for  $n_e = n_c = 2500$ . And Tables 10 through 15 summarized the power for  $n_e = 1700, n_c = 3300$ . Overall we can see that the proposed SKAT<sub>L</sub> and SKAT-O<sub>L</sub> have improved performance compared to the SKAT based approaches. When a large proportion of the variants are causal ( $\theta = 0.5$ ) with a mix of protective and deleterious variants, the SKAT-O<sub>L</sub> can adapt to the data and has the overall best performance.

Table 4: Power comparison of rare variant set analysis:  $n_e = n_c = 2500$ ,  $a_0 = 1, b_0 = 25$ , equal proportions of protective and deleterious variants. The highest powered tests in each row are bold-faced.

| $\theta = 0.05, d = -0.6$ |       |        |                   |                     |        |
|---------------------------|-------|--------|-------------------|---------------------|--------|
| $\alpha$                  | SKAT  | SKAT-O | SKAT <sub>L</sub> | SKAT-O <sub>L</sub> | Burden |
| $10^{-6}$                 | 0.165 | 0.137  | <b>0.2</b>        | 0.166               | 0.003  |
| $10^{-5}$                 | 0.228 | 0.2    | <b>0.263</b>      | 0.234               | 0.007  |
| $10^{-4}$                 | 0.308 | 0.281  | <b>0.352</b>      | 0.319               | 0.018  |
| $10^{-3}$                 | 0.429 | 0.399  | <b>0.474</b>      | 0.44                | 0.045  |
| $\theta = 0.1, d = -0.5$  |       |        |                   |                     |        |
| $\alpha$                  | SKAT  | SKAT-O | SKAT <sub>L</sub> | SKAT-O <sub>L</sub> | Burden |
| $10^{-6}$                 | 0.247 | 0.204  | <b>0.294</b>      | 0.244               | 0.008  |
| $10^{-5}$                 | 0.347 | 0.303  | <b>0.391</b>      | 0.351               | 0.016  |
| $10^{-4}$                 | 0.461 | 0.426  | <b>0.505</b>      | 0.469               | 0.035  |
| $10^{-3}$                 | 0.603 | 0.566  | <b>0.645</b>      | 0.609               | 0.075  |
| $\theta = 0.2, d = -0.4$  |       |        |                   |                     |        |
| $\alpha$                  | SKAT  | SKAT-O | SKAT <sub>L</sub> | SKAT-O <sub>L</sub> | Burden |
| $10^{-6}$                 | 0.348 | 0.295  | <b>0.396</b>      | 0.338               | 0.016  |
| $10^{-5}$                 | 0.474 | 0.424  | <b>0.519</b>      | 0.47                | 0.03   |
| $10^{-4}$                 | 0.612 | 0.57   | <b>0.651</b>      | 0.613               | 0.063  |
| $10^{-3}$                 | 0.758 | 0.728  | <b>0.788</b>      | 0.761               | 0.117  |
| $\theta = 0.5, d = -0.25$ |       |        |                   |                     |        |
| $\alpha$                  | SKAT  | SKAT-O | SKAT <sub>L</sub> | SKAT-O <sub>L</sub> | Burden |
| $10^{-6}$                 | 0.296 | 0.241  | <b>0.338</b>      | 0.278               | 0.014  |
| $10^{-5}$                 | 0.431 | 0.38   | <b>0.472</b>      | 0.42                | 0.028  |
| $10^{-4}$                 | 0.587 | 0.543  | <b>0.627</b>      | 0.583               | 0.057  |
| $10^{-3}$                 | 0.755 | 0.723  | <b>0.784</b>      | 0.754               | 0.112  |

Table 5: Power comparison of rare variant set analysis:  $n_e = n_c = 2500$ ,  $a_0 = 0.5, b_0 = 24.5$ , equal proportions of protective and deleterious variants. The highest powered tests in each row are bold-faced.

| $\theta = 0.05, d = -0.6$ |       |        |                   |                     |        |
|---------------------------|-------|--------|-------------------|---------------------|--------|
| $\alpha$                  | SKAT  | SKAT-O | SKAT <sub>L</sub> | SKAT-O <sub>L</sub> | Burden |
| $10^{-6}$                 | 0.045 | 0.025  | <b>0.086</b>      | 0.05                | 0      |
| $10^{-5}$                 | 0.095 | 0.058  | <b>0.149</b>      | 0.102               | 0      |
| $10^{-4}$                 | 0.182 | 0.134  | <b>0.251</b>      | 0.202               | 0.003  |
| $10^{-3}$                 | 0.326 | 0.275  | <b>0.403</b>      | 0.348               | 0.013  |
| $\theta = 0.1, d = -0.5$  |       |        |                   |                     |        |
| $\alpha$                  | SKAT  | SKAT-O | SKAT <sub>L</sub> | SKAT-O <sub>L</sub> | Burden |
| $10^{-6}$                 | 0.123 | 0.078  | <b>0.186</b>      | 0.123               | 0.001  |
| $10^{-5}$                 | 0.215 | 0.151  | <b>0.293</b>      | 0.217               | 0.002  |
| $10^{-4}$                 | 0.356 | 0.291  | <b>0.437</b>      | 0.366               | 0.008  |
| $10^{-3}$                 | 0.548 | 0.485  | <b>0.62</b>       | 0.559               | 0.027  |
| $\theta = 0.2, d = -0.4$  |       |        |                   |                     |        |
| $\alpha$                  | SKAT  | SKAT-O | SKAT <sub>L</sub> | SKAT-O <sub>L</sub> | Burden |
| $10^{-6}$                 | 0.253 | 0.176  | <b>0.33</b>       | 0.239               | 0.003  |
| $10^{-5}$                 | 0.392 | 0.301  | <b>0.469</b>      | 0.38                | 0.007  |
| $10^{-4}$                 | 0.56  | 0.484  | <b>0.63</b>       | 0.555               | 0.017  |
| $10^{-3}$                 | 0.746 | 0.688  | <b>0.795</b>      | 0.746               | 0.05   |
| $\theta = 0.5, d = -0.25$ |       |        |                   |                     |        |
| $\alpha$                  | SKAT  | SKAT-O | SKAT <sub>L</sub> | SKAT-O <sub>L</sub> | Burden |
| $10^{-6}$                 | 0.205 | 0.141  | <b>0.264</b>      | 0.185               | 0.002  |
| $10^{-5}$                 | 0.332 | 0.25   | <b>0.4</b>        | 0.311               | 0.007  |
| $10^{-4}$                 | 0.515 | 0.437  | <b>0.576</b>      | 0.501               | 0.02   |
| $10^{-3}$                 | 0.721 | 0.661  | <b>0.764</b>      | 0.717               | 0.052  |

Table 6: Power comparison of rare variant set analysis:  $n_e = n_c = 2500$ ,  $a_0 = 1.5$ ,  $b_0 = 25.5$ , equal proportions of protective and deleterious variants. The highest powered tests in each row are bold-faced.

| $\theta = 0.05, d = -0.6$ |       |        |                   |                     |        |
|---------------------------|-------|--------|-------------------|---------------------|--------|
| $\alpha$                  | SKAT  | SKAT-O | SKAT <sub>L</sub> | SKAT-O <sub>L</sub> | Burden |
| $10^{-6}$                 | 0.113 | 0.104  | <b>0.13</b>       | 0.12                | 0.012  |
| $10^{-5}$                 | 0.153 | 0.139  | <b>0.17</b>       | 0.157               | 0.022  |
| $10^{-4}$                 | 0.207 | 0.194  | <b>0.224</b>      | 0.212               | 0.042  |
| $10^{-3}$                 | 0.281 | 0.267  | <b>0.302</b>      | 0.289               | 0.076  |
| $\theta = 0.1, d = -0.5$  |       |        |                   |                     |        |
| $\alpha$                  | SKAT  | SKAT-O | SKAT <sub>L</sub> | SKAT-O <sub>L</sub> | Burden |
| $10^{-6}$                 | 0.151 | 0.138  | <b>0.171</b>      | 0.158               | 0.02   |
| $10^{-5}$                 | 0.213 | 0.198  | <b>0.237</b>      | 0.221               | 0.033  |
| $10^{-4}$                 | 0.296 | 0.282  | <b>0.319</b>      | 0.304               | 0.06   |
| $10^{-3}$                 | 0.405 | 0.392  | <b>0.431</b>      | 0.414               | 0.109  |
| $\theta = 0.2, d = -0.4$  |       |        |                   |                     |        |
| $\alpha$                  | SKAT  | SKAT-O | SKAT <sub>L</sub> | SKAT-O <sub>L</sub> | Burden |
| $10^{-6}$                 | 0.188 | 0.178  | <b>0.211</b>      | 0.2                 | 0.033  |
| $10^{-5}$                 | 0.271 | 0.256  | <b>0.298</b>      | 0.284               | 0.055  |
| $10^{-4}$                 | 0.386 | 0.372  | <b>0.413</b>      | 0.397               | 0.088  |
| $10^{-3}$                 | 0.534 | 0.515  | <b>0.558</b>      | 0.54                | 0.147  |
| $\theta = 0.5, d = -0.25$ |       |        |                   |                     |        |
| $\alpha$                  | SKAT  | SKAT-O | SKAT <sub>L</sub> | SKAT-O <sub>L</sub> | Burden |
| $10^{-6}$                 | 0.154 | 0.143  | <b>0.174</b>      | 0.163               | 0.025  |
| $10^{-5}$                 | 0.236 | 0.219  | <b>0.254</b>      | 0.24                | 0.048  |
| $10^{-4}$                 | 0.353 | 0.338  | <b>0.374</b>      | 0.36                | 0.082  |
| $10^{-3}$                 | 0.523 | 0.504  | <b>0.545</b>      | 0.528               | 0.145  |

Table 7: Power comparison of rare variant set analysis:  $n_e = n_c = 2500$ ,  $a_0 = 1$ ,  $b_0 = 25$ , unequal proportions of protective and deleterious variants. The highest powered tests in each row are bold-faced.

| $\theta = 0.05, d = -0.6$ |       |        |                   |                     |        |
|---------------------------|-------|--------|-------------------|---------------------|--------|
| $\alpha$                  | SKAT  | SKAT-O | SKAT <sub>L</sub> | SKAT-O <sub>L</sub> | Burden |
| $10^{-6}$                 | 0.086 | 0.07   | <b>0.105</b>      | 0.084               | 0.003  |
| $10^{-5}$                 | 0.129 | 0.111  | <b>0.151</b>      | 0.129               | 0.008  |
| $10^{-4}$                 | 0.186 | 0.166  | <b>0.21</b>       | 0.188               | 0.016  |
| $10^{-3}$                 | 0.278 | 0.249  | <b>0.303</b>      | 0.278               | 0.037  |
| $\theta = 0.1, d = -0.5$  |       |        |                   |                     |        |
| $\alpha$                  | SKAT  | SKAT-O | SKAT <sub>L</sub> | SKAT-O <sub>L</sub> | Burden |
| $10^{-6}$                 | 0.148 | 0.126  | <b>0.172</b>      | 0.145               | 0.011  |
| $10^{-5}$                 | 0.211 | 0.189  | <b>0.239</b>      | 0.213               | 0.021  |
| $10^{-4}$                 | 0.306 | 0.277  | <b>0.337</b>      | 0.306               | 0.04   |
| $10^{-3}$                 | 0.428 | 0.399  | <b>0.459</b>      | 0.432               | 0.082  |
| $\theta = 0.2, d = -0.4$  |       |        |                   |                     |        |
| $\alpha$                  | SKAT  | SKAT-O | SKAT <sub>L</sub> | SKAT-O <sub>L</sub> | Burden |
| $10^{-6}$                 | 0.251 | 0.232  | <b>0.280</b>      | 0.260               | 0.052  |
| $10^{-5}$                 | 0.339 | 0.320  | <b>0.376</b>      | 0.353               | 0.082  |
| $10^{-4}$                 | 0.459 | 0.445  | <b>0.494</b>      | 0.477               | 0.131  |
| $10^{-3}$                 | 0.603 | 0.596  | <b>0.635</b>      | 0.625               | 0.217  |
| $\theta = 0.5, d = -0.25$ |       |        |                   |                     |        |
| $\alpha$                  | SKAT  | SKAT-O | SKAT <sub>L</sub> | SKAT-O <sub>L</sub> | Burden |
| $10^{-6}$                 | 0.322 | 0.38   | 0.358             | <b>0.408</b>        | 0.224  |
| $10^{-5}$                 | 0.431 | 0.505  | 0.468             | <b>0.535</b>        | 0.313  |
| $10^{-4}$                 | 0.566 | 0.648  | 0.596             | <b>0.672</b>        | 0.426  |
| $10^{-3}$                 | 0.718 | 0.788  | 0.744             | <b>0.806</b>        | 0.565  |



Table 8: Power comparison of rare variant set analysis:  $n_e = n_c = 2500$ ,  $a_0 = 0.5, b_0 = 24.5$ , unequal proportions of protective and deleterious variants. The highest powered tests in each row are bold-faced.

| $\theta = 0.05, d = -0.6$ |       |        |                   |                     |        |
|---------------------------|-------|--------|-------------------|---------------------|--------|
| $\alpha$                  | SKAT  | SKAT-O | SKAT <sub>L</sub> | SKAT-O <sub>L</sub> | Burden |
| $10^{-6}$                 | 0.015 | 0.01   | <b>0.024</b>      | 0.017               | 0      |
| $10^{-5}$                 | 0.027 | 0.019  | <b>0.042</b>      | 0.027               | 0      |
| $10^{-4}$                 | 0.055 | 0.041  | <b>0.08</b>       | 0.059               | 0.002  |
| $10^{-3}$                 | 0.119 | 0.098  | <b>0.158</b>      | 0.129               | 0.008  |
| $\theta = 0.1, d = -0.5$  |       |        |                   |                     |        |
| $\alpha$                  | SKAT  | SKAT-O | SKAT <sub>L</sub> | SKAT-O <sub>L</sub> | Burden |
| $10^{-6}$                 | 0.045 | 0.03   | <b>0.066</b>      | 0.046               | 0      |
| $10^{-5}$                 | 0.079 | 0.057  | <b>0.108</b>      | 0.081               | 0.002  |
| $10^{-4}$                 | 0.141 | 0.117  | <b>0.181</b>      | 0.15                | 0.007  |
| $10^{-3}$                 | 0.26  | 0.225  | <b>0.312</b>      | 0.272               | 0.026  |
| $\theta = 0.2, d = -0.4$  |       |        |                   |                     |        |
| $\alpha$                  | SKAT  | SKAT-O | SKAT <sub>L</sub> | SKAT-O <sub>L</sub> | Burden |
| $10^{-6}$                 | 0.125 | 0.101  | <b>0.164</b>      | 0.132               | 0.008  |
| $10^{-5}$                 | 0.197 | 0.167  | <b>0.246</b>      | 0.21                | 0.019  |
| $10^{-4}$                 | 0.312 | 0.288  | <b>0.368</b>      | 0.339               | 0.046  |
| $10^{-3}$                 | 0.481 | 0.467  | <b>0.54</b>       | 0.519               | 0.108  |
| $\theta = 0.5, d = -0.25$ |       |        |                   |                     |        |
| $\alpha$                  | SKAT  | SKAT-O | SKAT <sub>L</sub> | SKAT-O <sub>L</sub> | Burden |
| $10^{-6}$                 | 0.195 | 0.234  | 0.241             | <b>0.271</b>        | 0.092  |
| $10^{-5}$                 | 0.29  | 0.359  | 0.348             | <b>0.404</b>        | 0.166  |
| $10^{-4}$                 | 0.437 | 0.539  | 0.489             | <b>0.58</b>         | 0.283  |
| $10^{-3}$                 | 0.622 | 0.73   | 0.671             | <b>0.762</b>        | 0.459  |

Table 9: Power comparison of rare variant set analysis:  $n_e = n_c = 2500$ ,  $a_0 = 1.5$ ,  $b_0 = 25.5$ , unequal proportions of protective and deleterious variants. The highest powered tests in each row are bold-faced.

| $\theta = 0.05, d = -0.6$ |       |        |                   |                     |        |
|---------------------------|-------|--------|-------------------|---------------------|--------|
| $\alpha$                  | SKAT  | SKAT-O | SKAT <sub>L</sub> | SKAT-O <sub>L</sub> | Burden |
| $10^{-6}$                 | 0.074 | 0.066  | <b>0.087</b>      | 0.079               | 0.013  |
| $10^{-5}$                 | 0.108 | 0.1    | <b>0.121</b>      | 0.112               | 0.021  |
| $10^{-4}$                 | 0.155 | 0.142  | <b>0.167</b>      | 0.156               | 0.038  |
| $10^{-3}$                 | 0.221 | 0.207  | <b>0.234</b>      | 0.22                | 0.07   |
| $\theta = 0.1, d = -0.5$  |       |        |                   |                     |        |
| $\alpha$                  | SKAT  | SKAT-O | SKAT <sub>L</sub> | SKAT-O <sub>L</sub> | Burden |
| $10^{-6}$                 | 0.116 | 0.113  | <b>0.132</b>      | 0.125               | 0.03   |
| $10^{-5}$                 | 0.164 | 0.158  | <b>0.178</b>      | 0.172               | 0.046  |
| $10^{-4}$                 | 0.233 | 0.222  | <b>0.25</b>       | 0.239               | 0.074  |
| $10^{-3}$                 | 0.328 | 0.316  | <b>0.346</b>      | 0.334               | 0.126  |
| $\theta = 0.2, d = -0.4$  |       |        |                   |                     |        |
| $\alpha$                  | SKAT  | SKAT-O | SKAT <sub>L</sub> | SKAT-O <sub>L</sub> | Burden |
| $10^{-6}$                 | 0.18  | 0.186  | 0.197             | <b>0.204</b>        | 0.086  |
| $10^{-5}$                 | 0.242 | 0.248  | 0.263             | <b>0.267</b>        | 0.118  |
| $10^{-4}$                 | 0.336 | 0.338  | 0.354             | <b>0.359</b>        | 0.167  |
| $10^{-3}$                 | 0.461 | 0.461  | 0.479             | <b>0.48</b>         | 0.243  |
| $\theta = 0.5, d = -0.25$ |       |        |                   |                     |        |
| $\alpha$                  | SKAT  | SKAT-O | SKAT <sub>L</sub> | SKAT-O <sub>L</sub> | Burden |
| $10^{-6}$                 | 0.225 | 0.292  | 0.245             | <b>0.313</b>        | 0.229  |
| $10^{-5}$                 | 0.302 | 0.382  | 0.324             | <b>0.403</b>        | 0.298  |
| $10^{-4}$                 | 0.408 | 0.497  | 0.431             | <b>0.516</b>        | 0.386  |
| $10^{-3}$                 | 0.554 | 0.637  | 0.573             | <b>0.655</b>        | 0.505  |

Table 10: Power comparison of rare variant set analysis:  $n_e = 1700, n_c = 3300, a_0 = 1, b_0 = 25$ , equal proportions of protective and deleterious variants. The highest powered tests in each row are bold-faced.

| $\theta = 0.05, d = -0.6$ |       |        |                   |                     |        |
|---------------------------|-------|--------|-------------------|---------------------|--------|
| $\alpha$                  | SKAT  | SKAT-O | SKAT <sub>L</sub> | SKAT-O <sub>L</sub> | Burden |
| $10^{-6}$                 | 0.162 | 0.136  | <b>0.166</b>      | 0.136               | 0.005  |
| $10^{-5}$                 | 0.217 | 0.191  | <b>0.224</b>      | 0.194               | 0.01   |
| $10^{-4}$                 | 0.293 | 0.264  | <b>0.305</b>      | 0.273               | 0.023  |
| $10^{-3}$                 | 0.403 | 0.373  | <b>0.419</b>      | 0.385               | 0.053  |
| $\theta = 0.1, d = -0.5$  |       |        |                   |                     |        |
| $\alpha$                  | SKAT  | SKAT-O | SKAT <sub>L</sub> | SKAT-O <sub>L</sub> | Burden |
| $10^{-6}$                 | 0.236 | 0.2    | <b>0.246</b>      | 0.204               | 0.012  |
| $10^{-5}$                 | 0.324 | 0.289  | <b>0.334</b>      | 0.294               | 0.023  |
| $10^{-4}$                 | 0.432 | 0.399  | <b>0.447</b>      | 0.409               | 0.049  |
| $10^{-3}$                 | 0.57  | 0.536  | <b>0.584</b>      | 0.549               | 0.091  |
| $\theta = 0.2, d = -0.4$  |       |        |                   |                     |        |
| $\alpha$                  | SKAT  | SKAT-O | SKAT <sub>L</sub> | SKAT-O <sub>L</sub> | Burden |
| $10^{-6}$                 | 0.31  | 0.263  | <b>0.325</b>      | 0.267               | 0.021  |
| $10^{-5}$                 | 0.425 | 0.382  | <b>0.441</b>      | 0.39                | 0.038  |
| $10^{-4}$                 | 0.564 | 0.524  | <b>0.584</b>      | 0.537               | 0.07   |
| $10^{-3}$                 | 0.718 | 0.683  | <b>0.734</b>      | 0.695               | 0.128  |
| $\theta = 0.5, d = -0.25$ |       |        |                   |                     |        |
| $\alpha$                  | SKAT  | SKAT-O | SKAT <sub>L</sub> | SKAT-O <sub>L</sub> | Burden |
| $10^{-6}$                 | 0.264 | 0.219  | <b>0.279</b>      | 0.225               | 0.017  |
| $10^{-5}$                 | 0.384 | 0.338  | <b>0.402</b>      | 0.35                | 0.034  |
| $10^{-4}$                 | 0.536 | 0.49   | <b>0.556</b>      | 0.509               | 0.065  |
| $10^{-3}$                 | 0.713 | 0.676  | <b>0.73</b>       | 0.691               | 0.124  |

Table 11: Power comparison of rare variant set analysis:  $n_e = 1700, n_c = 3300, a_0 = 0.5, b_0 = 24.5$ , equal proportions of protective and deleterious variants. The highest powered tests in each row are bold-faced.

| $\theta = 0.05, d = -0.6$ |       |        |                   |                     |        |
|---------------------------|-------|--------|-------------------|---------------------|--------|
| $\alpha$                  | SKAT  | SKAT-O | SKAT <sub>L</sub> | SKAT-O <sub>L</sub> | Burden |
| $10^{-6}$                 | 0.082 | 0.052  | <b>0.086</b>      | 0.052               | 0.001  |
| $10^{-5}$                 | 0.141 | 0.099  | <b>0.147</b>      | 0.103               | 0.001  |
| $10^{-4}$                 | 0.229 | 0.186  | <b>0.24</b>       | 0.192               | 0.005  |
| $10^{-3}$                 | 0.373 | 0.319  | <b>0.393</b>      | 0.336               | 0.016  |
| $\theta = 0.1, d = -0.5$  |       |        |                   |                     |        |
| $\alpha$                  | SKAT  | SKAT-O | SKAT <sub>L</sub> | SKAT-O <sub>L</sub> | Burden |
| $10^{-6}$                 | 0.171 | 0.122  | <b>0.183</b>      | 0.125               | 0.002  |
| $10^{-5}$                 | 0.268 | 0.206  | <b>0.287</b>      | 0.212               | 0.005  |
| $10^{-4}$                 | 0.405 | 0.341  | <b>0.426</b>      | 0.357               | 0.014  |
| $10^{-3}$                 | 0.584 | 0.52   | <b>0.603</b>      | 0.535               | 0.039  |
| $\theta = 0.2, d = -0.4$  |       |        |                   |                     |        |
| $\alpha$                  | SKAT  | SKAT-O | SKAT <sub>L</sub> | SKAT-O <sub>L</sub> | Burden |
| $10^{-6}$                 | 0.27  | 0.2    | <b>0.294</b>      | 0.209               | 0.004  |
| $10^{-5}$                 | 0.408 | 0.321  | <b>0.43</b>       | 0.339               | 0.01   |
| $10^{-4}$                 | 0.567 | 0.494  | <b>0.589</b>      | 0.514               | 0.024  |
| $10^{-3}$                 | 0.742 | 0.688  | <b>0.764</b>      | 0.705               | 0.066  |
| $\theta = 0.5, d = -0.25$ |       |        |                   |                     |        |
| $\alpha$                  | SKAT  | SKAT-O | SKAT <sub>L</sub> | SKAT-O <sub>L</sub> | Burden |
| $10^{-6}$                 | 0.216 | 0.157  | <b>0.238</b>      | 0.164               | 0.004  |
| $10^{-5}$                 | 0.342 | 0.267  | <b>0.369</b>      | 0.281               | 0.01   |
| $10^{-4}$                 | 0.512 | 0.44   | <b>0.54</b>       | 0.463               | 0.024  |
| $10^{-3}$                 | 0.704 | 0.644  | <b>0.728</b>      | 0.668               | 0.064  |

Table 12: Power comparison of rare variant set analysis:  $n_e = 1700, n_c = 3300, a_0 = 1.5, b_0 = 25.5$ , equal proportions of protective and deleterious variants. The highest powered tests in each row are bold-faced.

| $\theta = 0.05, d = -0.6$ |       |        |                   |                     |        |
|---------------------------|-------|--------|-------------------|---------------------|--------|
| $\alpha$                  | SKAT  | SKAT-O | SKAT <sub>L</sub> | SKAT-O <sub>L</sub> | Burden |
| $10^{-6}$                 | 0.106 | 0.1    | <b>0.109</b>      | 0.1                 | 0.016  |
| $10^{-5}$                 | 0.142 | 0.132  | <b>0.145</b>      | 0.133               | 0.027  |
| $10^{-4}$                 | 0.186 | 0.175  | <b>0.192</b>      | 0.179               | 0.045  |
| $10^{-3}$                 | 0.257 | 0.243  | <b>0.264</b>      | 0.25                | 0.081  |
| $\theta = 0.1, d = -0.5$  |       |        |                   |                     |        |
| $\alpha$                  | SKAT  | SKAT-O | SKAT <sub>L</sub> | SKAT-O <sub>L</sub> | Burden |
| $10^{-6}$                 | 0.144 | 0.134  | <b>0.145</b>      | 0.132               | 0.026  |
| $10^{-5}$                 | 0.195 | 0.183  | <b>0.203</b>      | 0.188               | 0.043  |
| $10^{-4}$                 | 0.27  | 0.255  | <b>0.277</b>      | 0.261               | 0.068  |
| $10^{-3}$                 | 0.369 | 0.353  | <b>0.381</b>      | 0.36                | 0.115  |
| $\theta = 0.2, d = -0.4$  |       |        |                   |                     |        |
| $\alpha$                  | SKAT  | SKAT-O | SKAT <sub>L</sub> | SKAT-O <sub>L</sub> | Burden |
| $10^{-6}$                 | 0.162 | 0.153  | <b>0.17</b>       | 0.159               | 0.035  |
| $10^{-5}$                 | 0.237 | 0.222  | <b>0.246</b>      | 0.228               | 0.057  |
| $10^{-4}$                 | 0.338 | 0.325  | <b>0.352</b>      | 0.333               | 0.09   |
| $10^{-3}$                 | 0.476 | 0.456  | <b>0.488</b>      | 0.466               | 0.149  |
| $\theta = 0.5, d = -0.25$ |       |        |                   |                     |        |
| $\alpha$                  | SKAT  | SKAT-O | SKAT <sub>L</sub> | SKAT-O <sub>L</sub> | Burden |
| $10^{-6}$                 | 0.137 | 0.13   | <b>0.143</b>      | 0.132               | 0.031  |
| $10^{-5}$                 | 0.204 | 0.192  | <b>0.214</b>      | 0.199               | 0.05   |
| $10^{-4}$                 | 0.312 | 0.295  | <b>0.325</b>      | 0.302               | 0.084  |
| $10^{-3}$                 | 0.473 | 0.451  | <b>0.488</b>      | 0.458               | 0.142  |

Table 13: Power comparison of rare variant set analysis:  $n_e = 1700, n_c = 3300, a_0 = 1, b_0 = 25$ , unequal proportions of protective and deleterious variants. The highest powered tests in each row are bold-faced.

| $\theta = 0.05, d = -0.6$ |       |        |                   |                     |        |
|---------------------------|-------|--------|-------------------|---------------------|--------|
| $\alpha$                  | SKAT  | SKAT-O | SKAT <sub>L</sub> | SKAT-O <sub>L</sub> | Burden |
| $10^{-6}$                 | 0.04  | 0.031  | <b>0.063</b>      | 0.048               | 0.001  |
| $10^{-5}$                 | 0.071 | 0.056  | <b>0.1</b>        | 0.084               | 0.002  |
| $10^{-4}$                 | 0.118 | 0.101  | <b>0.155</b>      | 0.136               | 0.005  |
| $10^{-3}$                 | 0.196 | 0.174  | <b>0.237</b>      | 0.215               | 0.018  |
| $\theta = 0.1, d = -0.5$  |       |        |                   |                     |        |
| $\alpha$                  | SKAT  | SKAT-O | SKAT <sub>L</sub> | SKAT-O <sub>L</sub> | Burden |
| $10^{-6}$                 | 0.075 | 0.06   | <b>0.109</b>      | 0.088               | 0.004  |
| $10^{-5}$                 | 0.124 | 0.103  | <b>0.169</b>      | 0.147               | 0.008  |
| $10^{-4}$                 | 0.201 | 0.178  | <b>0.254</b>      | 0.231               | 0.018  |
| $10^{-3}$                 | 0.318 | 0.291  | <b>0.378</b>      | 0.351               | 0.047  |
| $\theta = 0.2, d = -0.4$  |       |        |                   |                     |        |
| $\alpha$                  | SKAT  | SKAT-O | SKAT <sub>L</sub> | SKAT-O <sub>L</sub> | Burden |
| $10^{-6}$                 | 0.129 | 0.112  | <b>0.186</b>      | 0.168               | 0.017  |
| $10^{-5}$                 | 0.207 | 0.192  | <b>0.276</b>      | 0.263               | 0.036  |
| $10^{-4}$                 | 0.318 | 0.31   | <b>0.391</b>      | 0.382               | 0.066  |
| $10^{-3}$                 | 0.473 | 0.464  | <b>0.542</b>      | 0.537               | 0.136  |
| $\theta = 0.5, d = -0.25$ |       |        |                   |                     |        |
| $\alpha$                  | SKAT  | SKAT-O | SKAT <sub>L</sub> | SKAT-O <sub>L</sub> | Burden |
| $10^{-6}$                 | 0.155 | 0.21   | 0.234             | <b>0.296</b>        | 0.118  |
| $10^{-5}$                 | 0.251 | 0.333  | 0.337             | <b>0.427</b>        | 0.191  |
| $10^{-4}$                 | 0.382 | 0.495  | 0.47              | <b>0.576</b>        | 0.303  |
| $10^{-3}$                 | 0.556 | 0.671  | 0.641             | <b>0.736</b>        | 0.456  |

Table 14: Power comparison of rare variant set analysis:  $n_e = 1700, n_c = 3300, a_0 = 0.5, b_0 = 24.5$ , unequal proportions of protective and deleterious variants. The highest powered tests in each row are bold-faced.

| $\theta = 0.05, d = -0.6$ |       |        |                   |                     |        |
|---------------------------|-------|--------|-------------------|---------------------|--------|
| $\alpha$                  | SKAT  | SKAT-O | SKAT <sub>L</sub> | SKAT-O <sub>L</sub> | Burden |
| $10^{-6}$                 | 0.006 | 0.003  | <b>0.01</b>       | 0.005               | 0      |
| $10^{-5}$                 | 0.012 | 0.008  | <b>0.021</b>      | 0.013               | 0      |
| $10^{-4}$                 | 0.03  | 0.02   | <b>0.046</b>      | 0.033               | 0.001  |
| $10^{-3}$                 | 0.074 | 0.056  | <b>0.108</b>      | 0.084               | 0.004  |
| $\theta = 0.1, d = -0.5$  |       |        |                   |                     |        |
| $\alpha$                  | SKAT  | SKAT-O | SKAT <sub>L</sub> | SKAT-O <sub>L</sub> | Burden |
| $10^{-6}$                 | 0.012 | 0.007  | <b>0.026</b>      | 0.014               | 0      |
| $10^{-5}$                 | 0.028 | 0.015  | <b>0.051</b>      | 0.035               | 0.001  |
| $10^{-4}$                 | 0.062 | 0.044  | <b>0.105</b>      | 0.078               | 0.002  |
| $10^{-3}$                 | 0.15  | 0.121  | <b>0.209</b>      | 0.18                | 0.014  |
| $\theta = 0.2, d = -0.4$  |       |        |                   |                     |        |
| $\alpha$                  | SKAT  | SKAT-O | SKAT <sub>L</sub> | SKAT-O <sub>L</sub> | Burden |
| $10^{-6}$                 | 0.034 | 0.023  | <b>0.069</b>      | 0.052               | 0.001  |
| $10^{-5}$                 | 0.069 | 0.051  | <b>0.124</b>      | 0.1                 | 0.006  |
| $10^{-4}$                 | 0.143 | 0.124  | <b>0.216</b>      | 0.199               | 0.02   |
| $10^{-3}$                 | 0.282 | 0.272  | <b>0.375</b>      | 0.371               | 0.059  |
| $\theta = 0.5, d = -0.25$ |       |        |                   |                     |        |
| $\alpha$                  | SKAT  | SKAT-O | SKAT <sub>L</sub> | SKAT-O <sub>L</sub> | Burden |
| $10^{-6}$                 | 0.046 | 0.065  | 0.099             | <b>0.129</b>        | 0.036  |
| $10^{-5}$                 | 0.092 | 0.143  | 0.166             | <b>0.233</b>        | 0.08   |
| $10^{-4}$                 | 0.176 | 0.293  | 0.277             | <b>0.406</b>        | 0.174  |
| $10^{-3}$                 | 0.334 | 0.522  | 0.448             | <b>0.624</b>        | 0.333  |

Table 15: Power comparison of rare variant set analysis:  $n_e = 1700, n_c = 3300, a_0 = 1.5, b_0 = 25.5$ , unequal proportions of protective and deleterious variants. The highest powered tests in each row are bold-faced.

| $\theta = 0.05, d = -0.6$ |       |        |                   |                     |        |
|---------------------------|-------|--------|-------------------|---------------------|--------|
| $\alpha$                  | SKAT  | SKAT-O | SKAT <sub>L</sub> | SKAT-O <sub>L</sub> | Burden |
| $10^{-6}$                 | 0.035 | 0.032  | <b>0.051</b>      | 0.046               | 0.004  |
| $10^{-5}$                 | 0.057 | 0.052  | <b>0.08</b>       | 0.072               | 0.006  |
| $10^{-4}$                 | 0.096 | 0.087  | <b>0.121</b>      | 0.112               | 0.017  |
| $10^{-3}$                 | 0.152 | 0.143  | <b>0.177</b>      | 0.17                | 0.039  |
| $\theta = 0.1, d = -0.5$  |       |        |                   |                     |        |
| $\alpha$                  | SKAT  | SKAT-O | SKAT <sub>L</sub> | SKAT-O <sub>L</sub> | Burden |
| $10^{-6}$                 | 0.054 | 0.051  | <b>0.077</b>      | 0.073               | 0.011  |
| $10^{-5}$                 | 0.088 | 0.083  | <b>0.119</b>      | 0.114               | 0.019  |
| $10^{-4}$                 | 0.149 | 0.14   | <b>0.184</b>      | 0.178               | 0.04   |
| $10^{-3}$                 | 0.238 | 0.23   | <b>0.277</b>      | 0.27                | 0.079  |
| $\theta = 0.2, d = -0.4$  |       |        |                   |                     |        |
| $\alpha$                  | SKAT  | SKAT-O | SKAT <sub>L</sub> | SKAT-O <sub>L</sub> | Burden |
| $10^{-6}$                 | 0.087 | 0.091  | 0.121             | <b>0.13</b>         | 0.034  |
| $10^{-5}$                 | 0.139 | 0.145  | 0.18              | <b>0.192</b>        | 0.057  |
| $10^{-4}$                 | 0.223 | 0.231  | 0.272             | <b>0.284</b>        | 0.099  |
| $10^{-3}$                 | 0.353 | 0.358  | 0.399             | <b>0.408</b>        | 0.167  |
| $\theta = 0.5, d = -0.25$ |       |        |                   |                     |        |
| $\alpha$                  | SKAT  | SKAT-O | SKAT <sub>L</sub> | SKAT-O <sub>L</sub> | Burden |
| $10^{-6}$                 | 0.102 | 0.163  | 0.147             | <b>0.22</b>         | 0.124  |
| $10^{-5}$                 | 0.164 | 0.241  | 0.215             | <b>0.308</b>        | 0.185  |
| $10^{-4}$                 | 0.26  | 0.362  | 0.319             | <b>0.432</b>        | 0.278  |
| $10^{-3}$                 | 0.406 | 0.521  | 0.465             | <b>0.579</b>        | 0.402  |



## 2 Significance p-value calculation

For the proposed  $SKAT_L$ , the p-values can be computed based on the mixture of 1-DF chi-square distributions. We use the Davies' method (Davies, 1980) implemented in the 'CompQuadForm' R package (Lafaye De Micheaux, 2013). When the Davies' method failed to converge, we use the saddlepoint approximation method (Kuonen, 1999) implemented in the 'survey' R package (Lumley, 2014) following the approach of Chen *et al.* (2014). When computing p-values for the proposed  $SKAT-O_L$ , we use the chi-square approximation to compute the quantile for the mixture of 1-DF chi-square distributions following the approach of Lee *et al.* (2012). The one-dimensional integration is then numerically computed based on the convolution of  $SKAT_L$  p-value and 1-DF chi-square distribution.

## 3 Numerical computation

Figure 2 shows the average CPU sec used to compute significance p-values for 1000 rare variant sets on a single Linux workstation with 3 GHz CPU and 8 GB memory. We follow the previous simulation setup with 2 covariates. We consider two sample sizes:  $n = 5000$  and  $n = 10000$  samples; and three variant set sizes: 25, 50 and 100 variants in each variant set. We repeated ten times and reported the average computing time. Overall we can see that all methods roughly scale linearly with the variant set size. The SKAT is the most efficient, and the proposed methods have comparable speed as the SKAT-O approach.

For the ARIC diabetes data, when analyzing 1415 variant sets on chromosome 1 on the same Linux workstation, SKAT takes 42 sec CPU time, SKAT-O takes 674 sec CPU time,  $SKAT_L$  takes 151 sec CPU time, and  $SKAT-O_L$  takes 630 sec CPU time on the same machine. In our simulation study, on average around 50% of the variants in a set have their minor allele counts less than 10 and we use their standardized score statistics to replace their likelihood ratio test statistics (LRT). When using the LRT for all rare variants in the proposed methods, the type I errors are significantly inflated (ratio of estimated type I errors over nominal significance level  $\alpha$  could be as high as 3.0).

Figure 2: Average CPU sec used to analyze 1000 variant sets: the x-axis shows the variant set size, the y-axis shows the average CPU sec used (over 10 simulations); the left plot is for 5000 samples and 2 covariates following our simulation setup, the right plot is for 10000 samples.

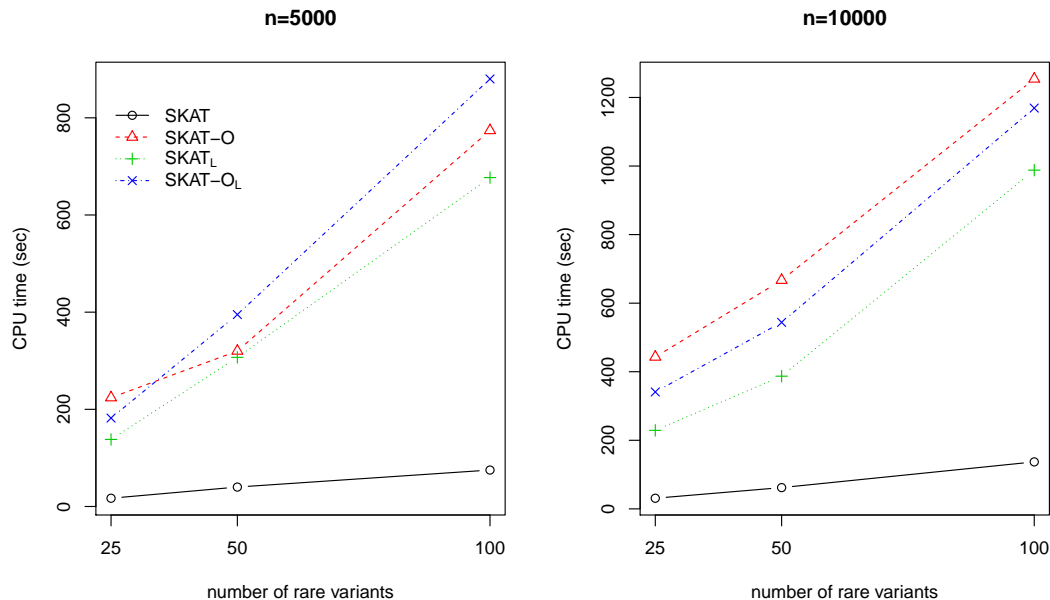

## 4 ARIC data analysis

One reviewer raised the concern that our diabetes analysis did not adjust for BMI, and the identified association between *ZZZ3* and type 2 diabetes could be confounded by BMI. When analyzing the ARIC type 2 diabetes outcome, we followed the convention of adjusting for the age, gender and field center (for potential population stratification/ethnicity). Initial GWAS analyses of type 2 diabetes in the ARIC white population also included adjustment principal components of ancestry in addition to the field center, but these PCA adjustments were found to make no difference in the effect estimates and were therefore not routinely included in subsequent analyses. The BMI is not included as a covariate for adjustment. In the DIAGRAM (DIABetes Genetics Replication And Meta-analysis) consortium, the largest international initiative to characterize the genetic basis of type 2 diabetes, the vast majority of studies (including the ARIC Study) did not adjust for BMI or any other measure of adiposity in efforts that led to discovery of several dozen new susceptibility loci for type 2 diabetes (Voight *et al.*, 2010; Morris

Table 16: Type I error of rare variant set analysis under 1:6 and 1:10 case-control ratio. The Type I errors have been divided by their nominal levels.

| case:control      | 1:6       |           |           | 1:10      |           |           |
|-------------------|-----------|-----------|-----------|-----------|-----------|-----------|
| $\alpha$          | $10^{-5}$ | $10^{-4}$ | $10^{-3}$ | $10^{-5}$ | $10^{-4}$ | $10^{-3}$ |
| SKAT              | 3.20      | 1.78      | 1.28      | 3.60      | 2.06      | 1.39      |
| SKAT <sub>L</sub> | 1.00      | 1.08      | 1.06      | 1.50      | 1.35      | 1.33      |

*et al.*, 2012). Of the 38 studies included in the 2012 DIAGRAM paper, only 4 studies adjusted for BMI and with most performing minimal adjustment for age, sex, and, in some cases, study specific covariates such as field center. It is true that at least one established diabetes locus (FTO) is also an established locus for BMI, but the consensus is that FTO’s downstream association with diabetes is mediated by its more proximal effect on BMI. Any risk factor such as BMI that falls on a causal pathway linking the gene variant and type 2 diabetes should not be treated as a confounder for analysis purposes. In the analysis, on average around 60% of the variants in a set have their minor allele counts less than 10 and we use their standardized score statistics to replace their likelihood ratio test statistics.

## 5 Unbalanced study

As reviewers suggested, we investigate the performance of the proposed methods under very unbalanced case-control ratios, 1:6 (mimicking the ARIC diabetes data) and 1:10. We use Beta(1,25) weight for SKAT and Beta(1.5,25.5) weight for SKAT<sub>L</sub>. We simulated  $10^4$  individuals and performed  $10^7$  simulations to estimate the type I errors. Table 16 summarizes the results. Under 1:6 case-control ratio, the proposed SKAT<sub>L</sub> has better controlled type I errors than SKAT, which has increased inflations under smaller significance level. Under 1:10 case-control ratio, both methods have inflated type I errors.

We performed  $10^4$  simulations to estimate the power under 1:6 case-control ratio with equal proportions of protective and deleterious variants. Table 7 summarizes the results. Overall we can see that the proposed SKAT<sub>L</sub> has larger power than SKAT.

Overall the proposed SKAT<sub>L</sub> has the best performance under balanced case-control study,

Table 17: Power comparison of rare variant set analysis under 1:6 case-control ratio.

|           | $\theta = 0.05, d = -0.6$ |                   | $\theta = 0.1, d = -0.5$ |                   | $\theta = 0.2, d = -0.4$ |                   | $\theta = 0.5, d = -0.25$ |                   |
|-----------|---------------------------|-------------------|--------------------------|-------------------|--------------------------|-------------------|---------------------------|-------------------|
| $\alpha$  | SKAT                      | SKAT <sub>L</sub> | SKAT                     | SKAT <sub>L</sub> | SKAT                     | SKAT <sub>L</sub> | SKAT                      | SKAT <sub>L</sub> |
| $10^{-6}$ | 0.372                     | 0.395             | 0.529                    | 0.561             | 0.660                    | 0.697             | 0.657                     | 0.699             |
| $10^{-5}$ | 0.414                     | 0.473             | 0.580                    | 0.651             | 0.712                    | 0.780             | 0.711                     | 0.784             |
| $10^{-4}$ | 0.541                     | 0.566             | 0.722                    | 0.748             | 0.844                    | 0.864             | 0.848                     | 0.869             |

and both SKAT and SKAT<sub>L</sub> have inflated type I errors under highly unbalanced case-control ratios, which are consistent with the performance of score test and likelihood ratio test in single rare variant association test (Ma *et al.*, 2013). More research is needed to develop methods that have appropriately calibrated p-values under unbalanced case-control ratios. Exactly computing the analytical p-value of SKAT-O is in general very difficult, and we have to employ some analytical and numerical approximations. Our simulation results have shown that the proposed SKAT<sub>O</sub> could control the type I errors though with conservative performance. SKAT-O was shown to have slightly inflated type I errors (Lee *et al.*, 2012, Table 2, p. 769). More research is needed to develop computational methods that can quickly compute better calibrated significance p-values for SKAT-O.

## References

- Chen,H., Lumley,T., Brody,J., Heard-Costa,N.L., Fox,C.S., Cupples,L.A. and Dupuis,J. (2014) Sequence kernel association test for survival traits. *Genetic Epidemiology*, **38** (3), 191–197.
- Davies,R.B. (1980) Algorithm AS 155: the distribution of a linear combination of  $\chi^2$  random variables. *Applied Statistics*, **29** (3), 323.
- Kuonen, D., 1999. Saddlepoint approximations for distributions of quadratic forms in normal variables. *Biometrika* 86 (4), 929–935.
- Lafaye De Micheaux, P., 2013. CompQuadForm: Distribution function of quadratic forms in normal variables. R package version 1.4.1. <http://cran.r-project.org/web/packages/CompQuadForm/index.html>

- Lee,S., Wu,M.C. and Lin,X. (2012) Optimal tests for rare variant effects in sequencing association studies. *Biostatistics*, **13** (4), 762–775.
- Lumley, T., 2014. survey: analysis of complex survey samples. R package version 3.30-3. <http://cran.r-project.org/web/packages/survey/index.html>
- Ma,C., Blackwell,T., Boehnke,M., Scott,L.J. and GoT2D Investigators. (2013) Recommended joint and meta-analysis strategies for case-control association testing of single low-count variants. *Genetic Epidemiology*, **37** (6), 539–550.
- Morris,A.P., Voight,B.F., Teslovich,T.M., Ferreira,T., Segre,A.V. and others. (2012) Large-scale association analysis provides insights into the genetic architecture and pathophysiology of type 2 diabetes. *Nature Genetics*, **44** (9), 981–990.
- Schaffner,S.F., Foo,C., Gabriel,S., Reich,D., Daly,M.J. and Altshuler,D. (2005) Calibrating a coalescent simulation of human genome sequence variation. *Genome Research*, **15** (11), 1576–1583.
- Voight,B.F., Scott,L.J., Steinthorsdottir,V., Morris,A.P., Dina,C., Welch,R.P., and others. (2010) Twelve type 2 diabetes susceptibility loci identified through large-scale association analysis. *Nature Genetics*, **42** (7), 579–589.
- Wu,M., Lee,S., Cai,T., Li,Y., Boehnke,M. and Lin,X. (2011) Rare-variant association testing for sequencing data with the sequence kernel association test. *The American Journal of Human Genetics*, **89** (1), 82–93.
